# Supplementary material for: One-step strategy to three-dimensional graphene/VO2nanobelt composite hydrogels for high performance supercapacitors
Source: Royal Society of Chemistry journal article supplement (doi:10.1039/c3ta13932h), 2013-11-02
Supplement: c3ta13932h.pdf [file c3ta13932h.pdf]

## Electronic Supplementary Information

# **One-step strategy to three-dimensional graphene/VO<sub>2</sub> nanobelt composite hydrogels for high performance supercapacitors**

Huanwen Wang, Huan Yi, Xiao Chen, Xuefeng Wang\*

*Department of Chemistry, Key Laboratory of Yangtze River Water Environment,  
Ministry of Education, Tongji University, Shanghai 200092, China*

Corresponding author, Email address: [xfwang@tongji.edu.cn](mailto:xfwang@tongji.edu.cn)

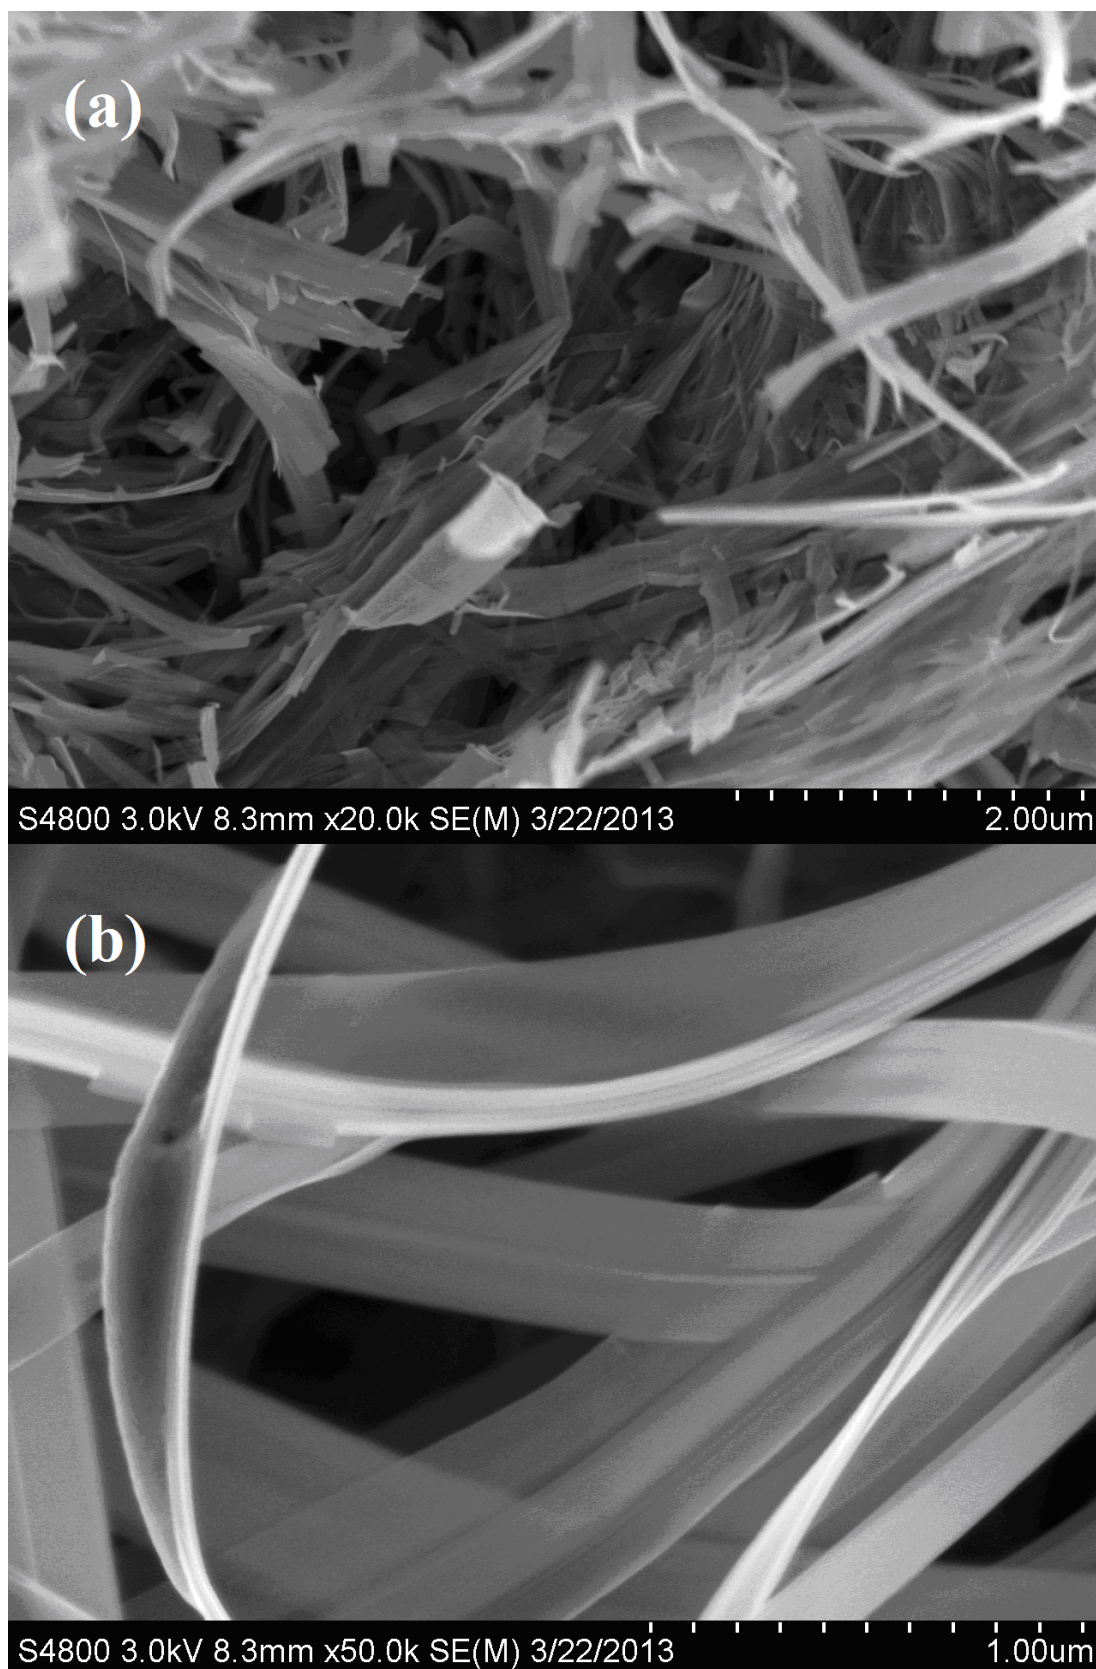



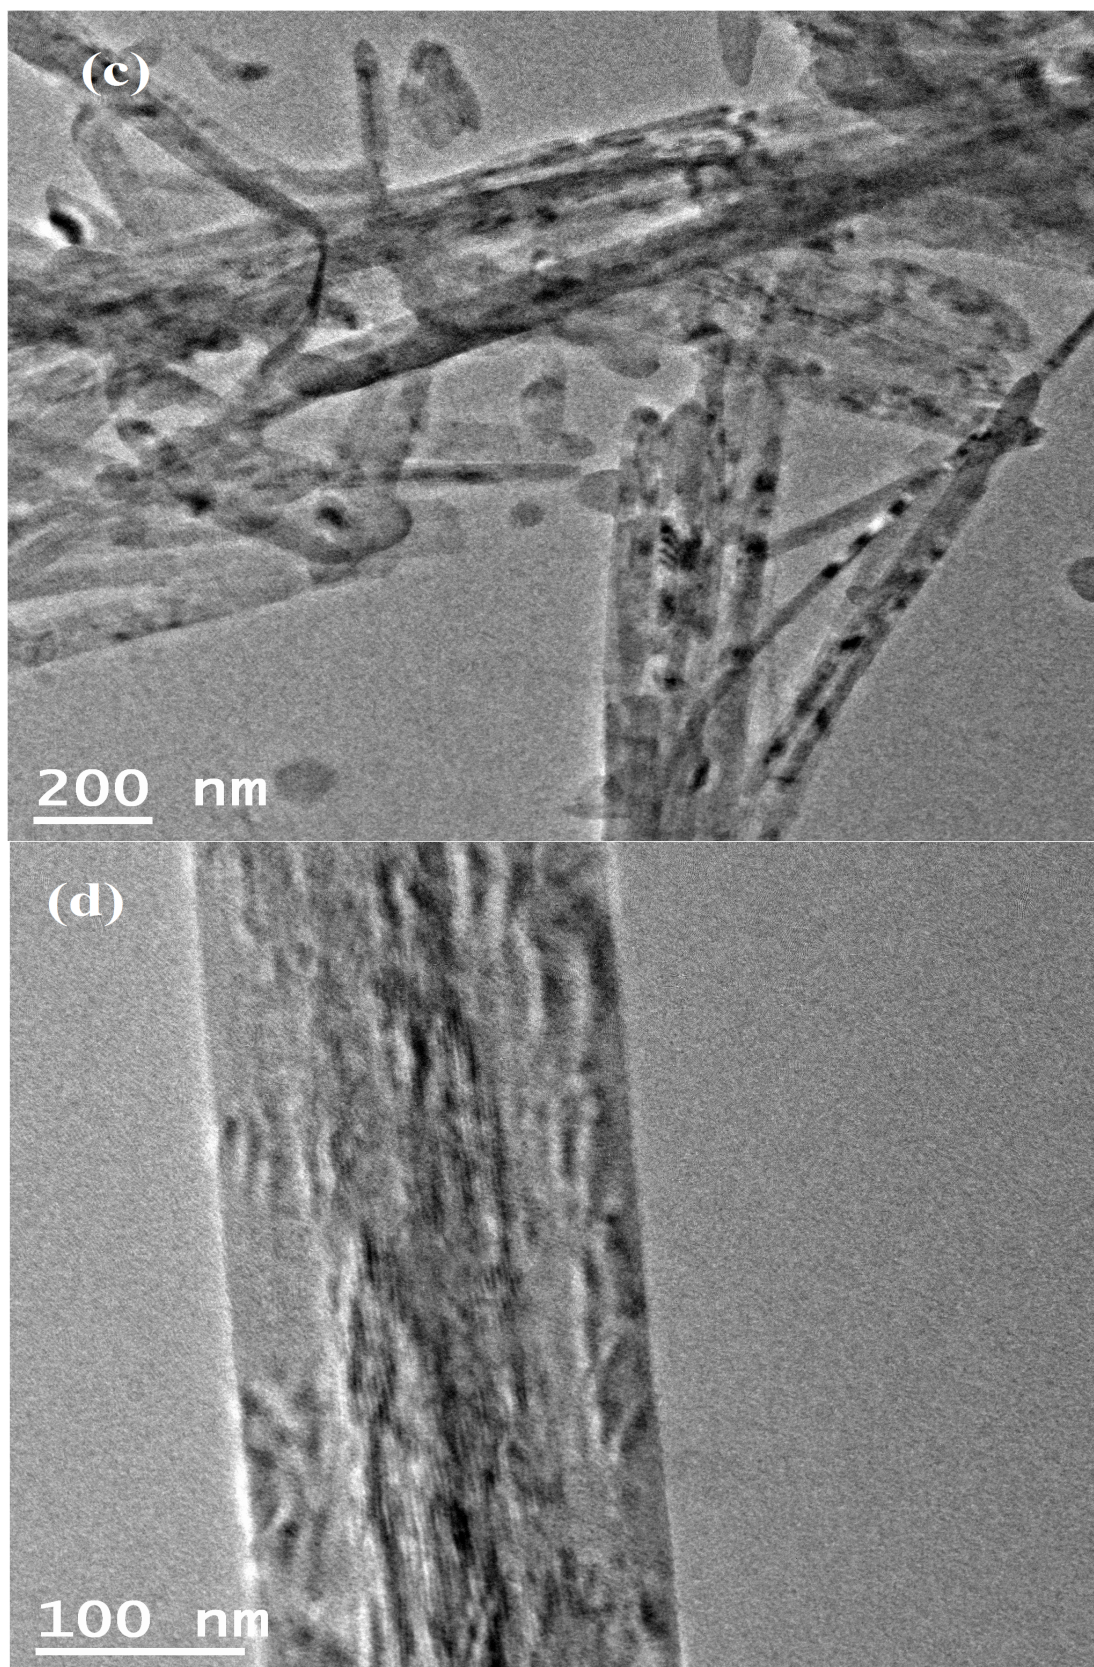

**Fig. S1** (a,b) FESEM and (c,d)TEM images of VO<sub>2</sub> nanobelts.

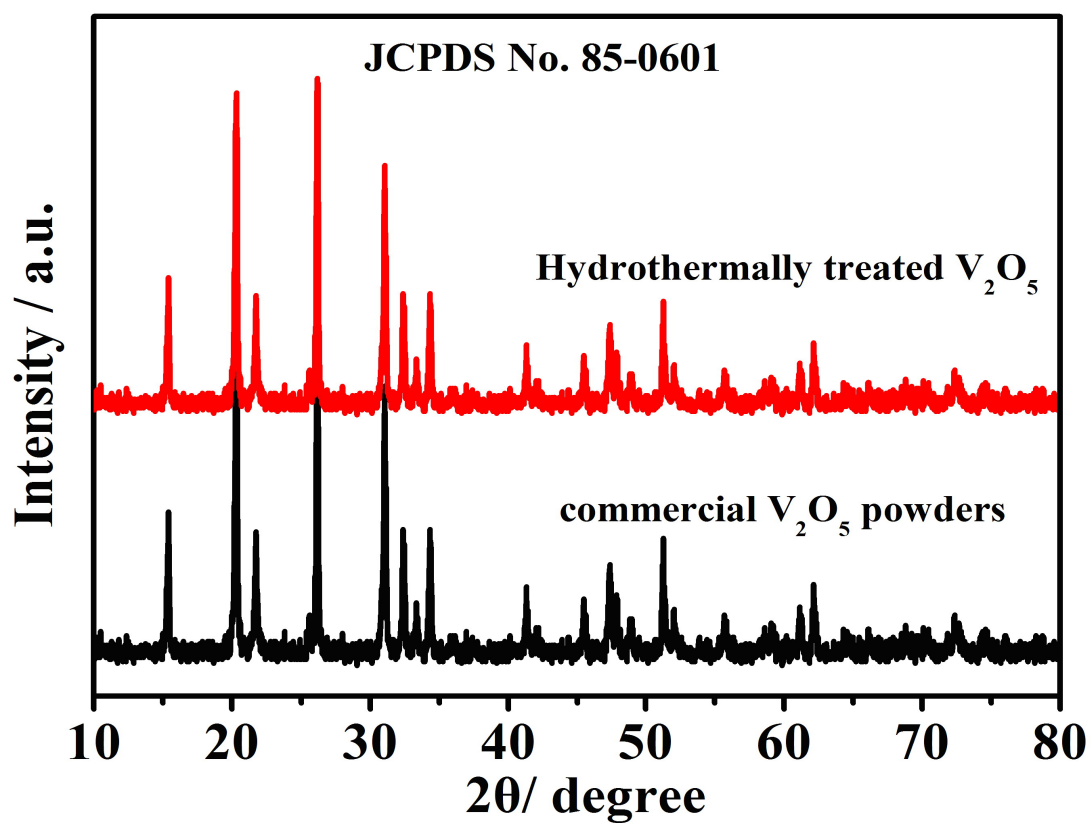

Fig. S2 XRD patterns of commercial V<sub>2</sub>O<sub>5</sub> powders and hydrothermally treated V<sub>2</sub>O<sub>5</sub>.



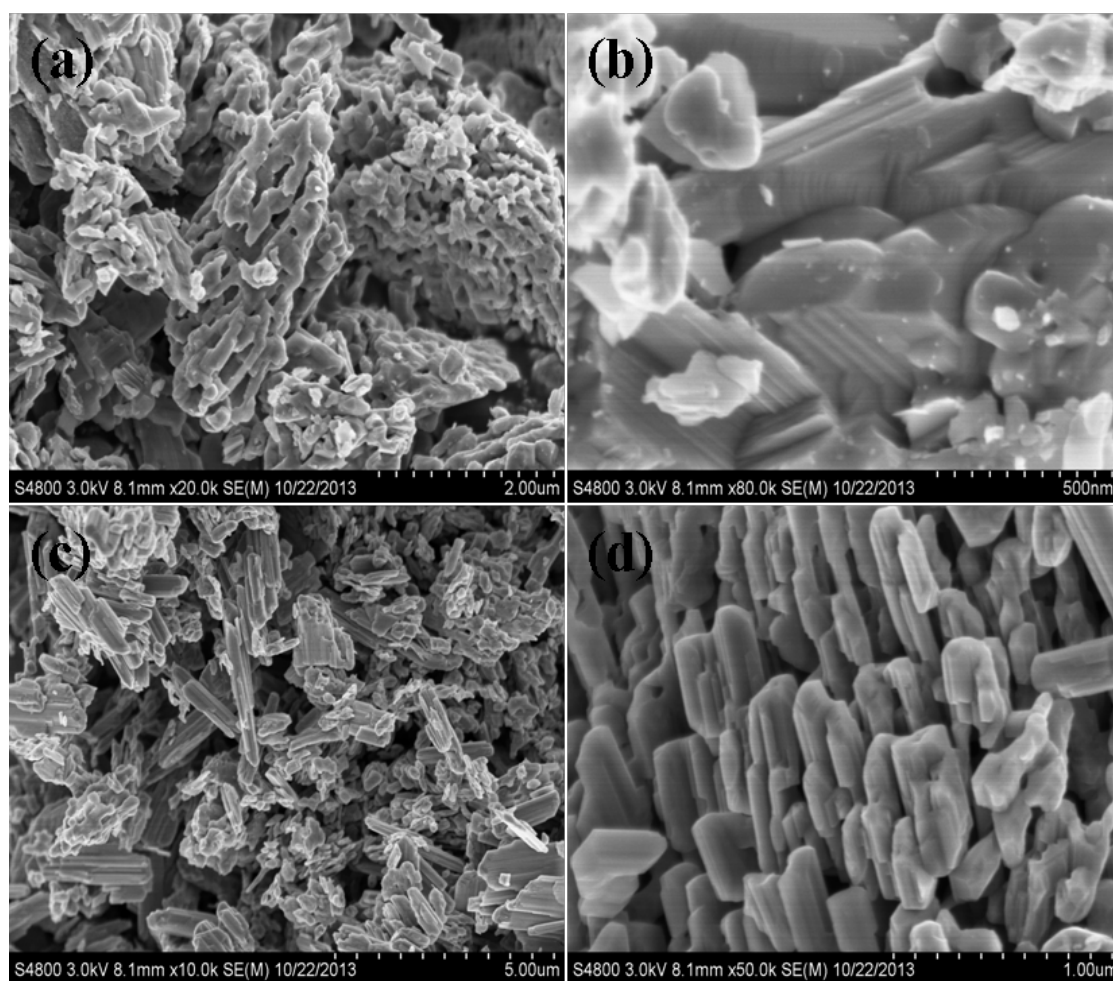

**Fig. S3** FESEM images of (a, b) commercial  $V_2O_5$  powders and (c, d) hydrothermally treated  $V_2O_5$

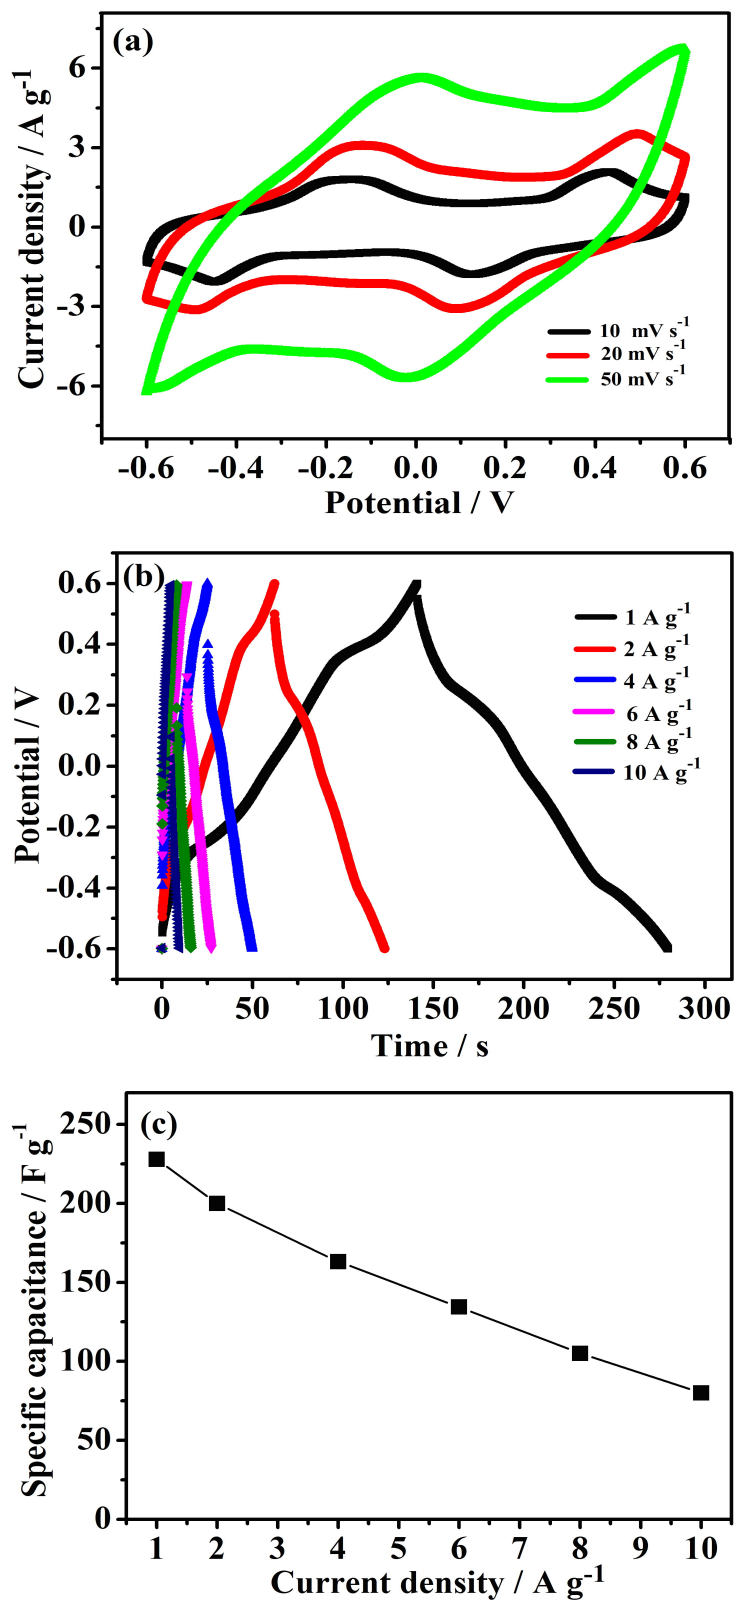

**Fig. S4** Electrochemical characteristics of VO<sub>2</sub> graphene mixture: (a) CV curves at various scan rates. (b) Galvanostatic discharge curves at various current densities. (c) Specific capacitance at different current densities.
